# Supplementary material
Source: publisher site journal article supplement (https://www.dovepress.com/article/573377)
Supplement: Supplementary file 1 [file 573377%20Revised%09Appendix.docx]

***This questionnaire was originally developed in French and has been translated into English for the purposes of this publication.***

**Phase:** VISIT 1 Pre-operative Questionnaires

1. Do you currently suffer from chronic pain (i.e., lasting for more than 3 months)?

*Examples: back pain, headaches, knee pain, fibromyalgia.*

☐ Yes

☐ No

2. Is the surgery you are about to have scheduled because of this chronic pain?

☐ Yes

☐ No

2a. Is this pain located in the part of your body that will be operated on?

☐ Yes

☐ No

3. In the last 7 days, have you had to take pain medication:

a) Every day

b) Between 4 and 8 days

c) Between 1 and 4 days

d) No medication

4. Have you ever suffered from depression (medical diagnosis)?

☐ Yes

☐ No

5. Are you being treated for anxiety or post-traumatic stress disorder (PTSD)?

☐ Yes

☐ No

6. Do you consume medication for anxiety (e.g., Xanax, Lexotanil, Atarax), pain (e.g., Tramal, morphine, Subutex), or stimulants (e.g., Ritalin) outside of a medical prescription?

☐ Yes

☐ No

**Do you consume:**

- Cannabis
- Alcohol (> 3 units/day)
- Tobacco
- Drugs (e.g., ecstasy, cocaine, heroin, LSD, psilocybin, mescaline, meth, GHB, etc.)

7. Over the last 6 months, have you felt overworked?

☐ Yes

☐ No

8. Do you present any of the following symptoms? (Check all that apply):

- ☐ 8.1. Sleep problems
- ☐ 8.2. Do you take medication to sleep better?
- ☐ 8.3. Exhaustion
- ☐ 8.4. Frightening thoughts
- ☐ 8.5. Dizziness
- ☐ 8.6. Palpitations
- ☐ 8.7. Feeling of being misunderstood
- ☐ 8.8. Trembling hands

9. Is your operation related to your work (e.g., occupational accident, professional illness)?

☐ Yes

☐ No

10. How do you imagine the pain you might have after your operation?

*Please provide a score between 0 and 10 (0 = no pain, 10 = worst imaginable pain).*

Score: ____ /10

**Note for implementation:** According to Althaus, item 8 is considered positive if at least 2 boxes are checked.
